# Supplementary material for: Base-edited CAR T Cells for combinational therapy against T cell malignancies
Source: bioRxiv or medRxiv preprint supplement (doi:10.1101/2020.07.30.228429), 2020-07-30

# Supplementary Figure 1

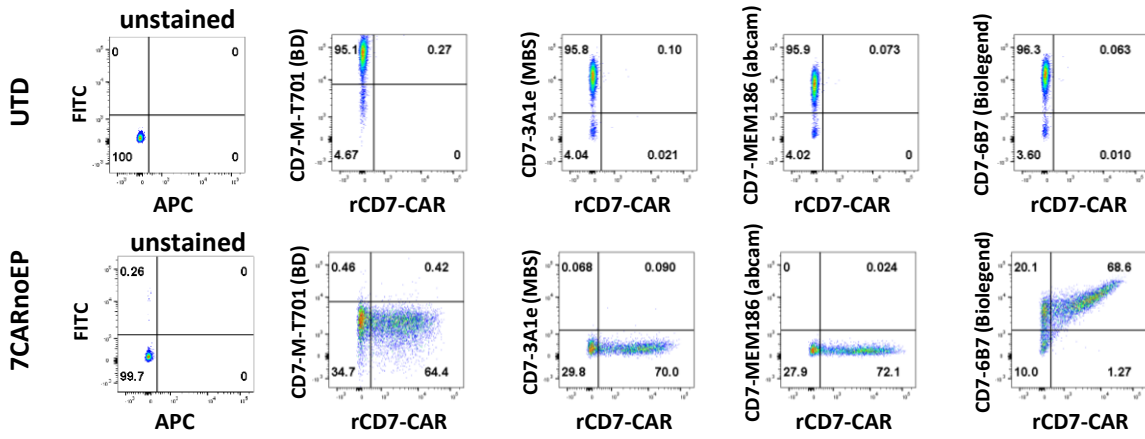

# Supplementary Figure 2

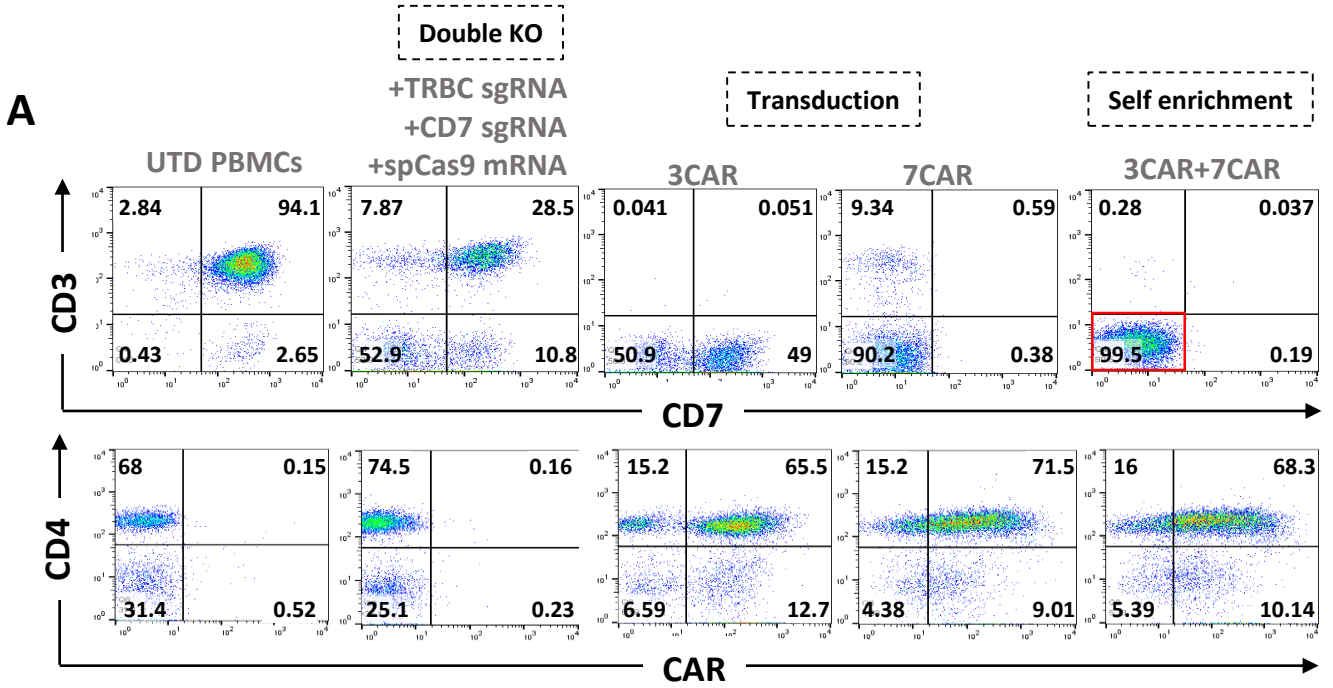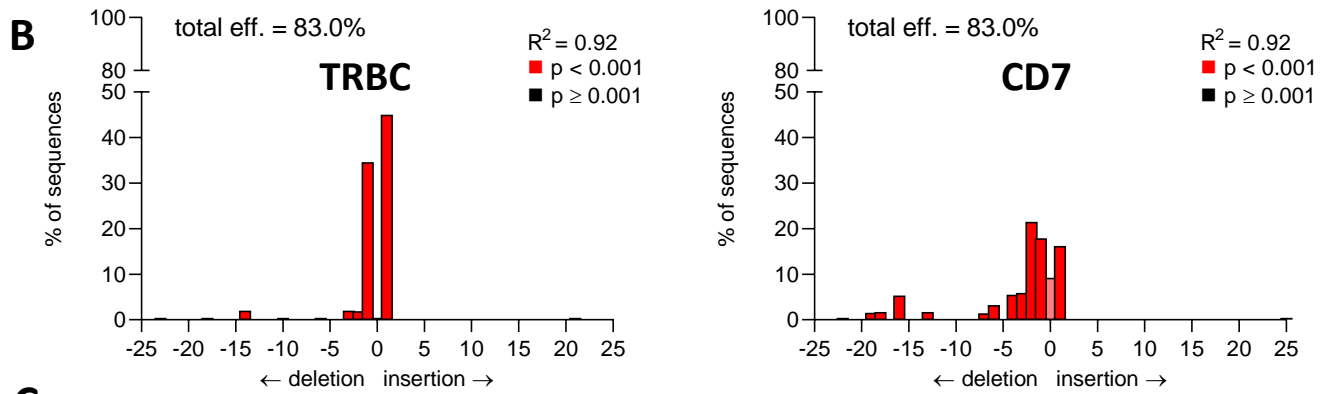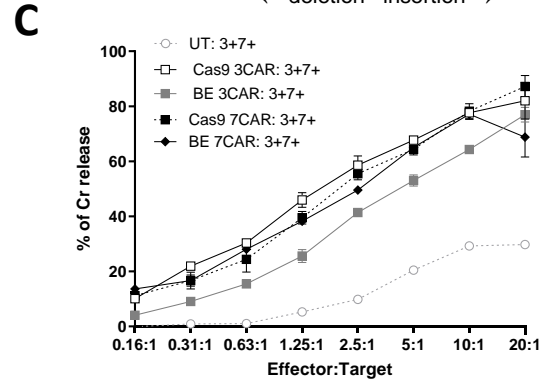

# Supplementary Figure 3

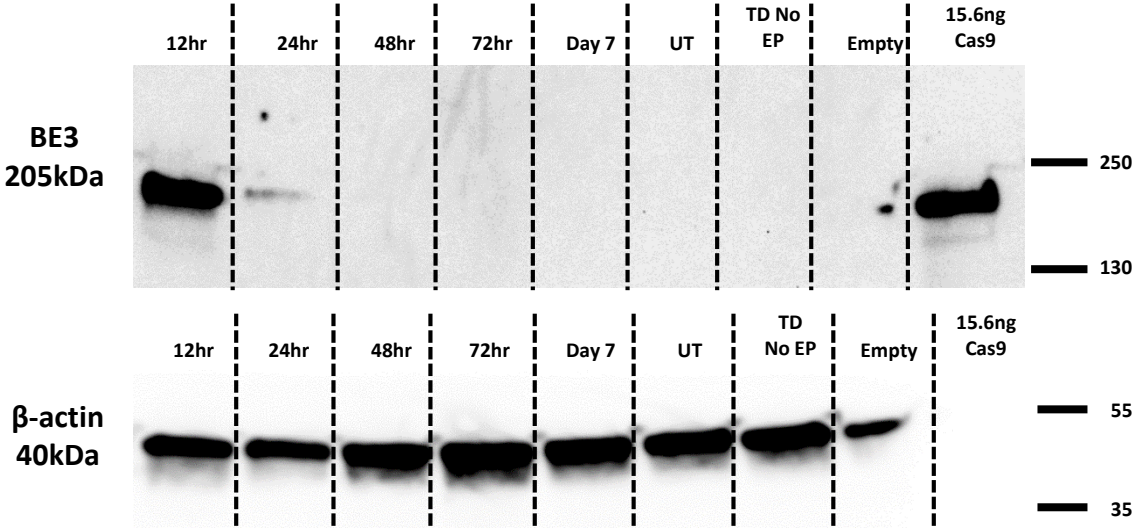

# Supplementary Figure 4

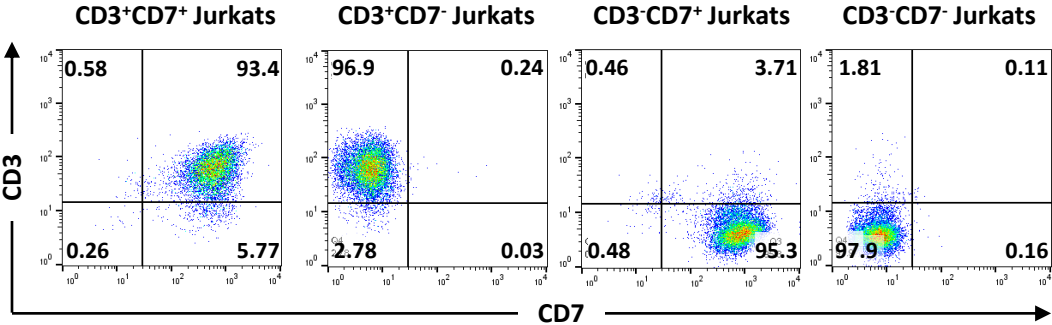

Supplement: Supplementary file [file media-1.pdf]
